# Supplementary material for: AntagomiR-103 and -107 Treatment Affects Cardiac Function and Metabolism
Source: PubMed Central journal article supplement (PMC6365487; doi:10.1016/j.omtn.2018.12.010), 2018-12-22
Supplement: mmc1.pdf [file mmc1.pdf]

**OMTN, Volume 14**

## **Supplemental Information**

### **AntagomiR-103 and -107 Treatment Affects**

#### **Cardiac Function and Metabolism**

**Monika Rech, Annika R. Kuhn, Joost Lumens, Paolo Carai, Rick van Leeuwen, Wouter Verhesen, Robin Verjans, Julie Lecomte, Yilin Liu, Joost J.F.P. Luiken, Ronny Mohren, Berta Cillero-Pastor, Stephane Heymans, Kèvin Knoops, Marc van Bilsen, and Blanche Schroen**

## Supplemental information

### Supplemental figures

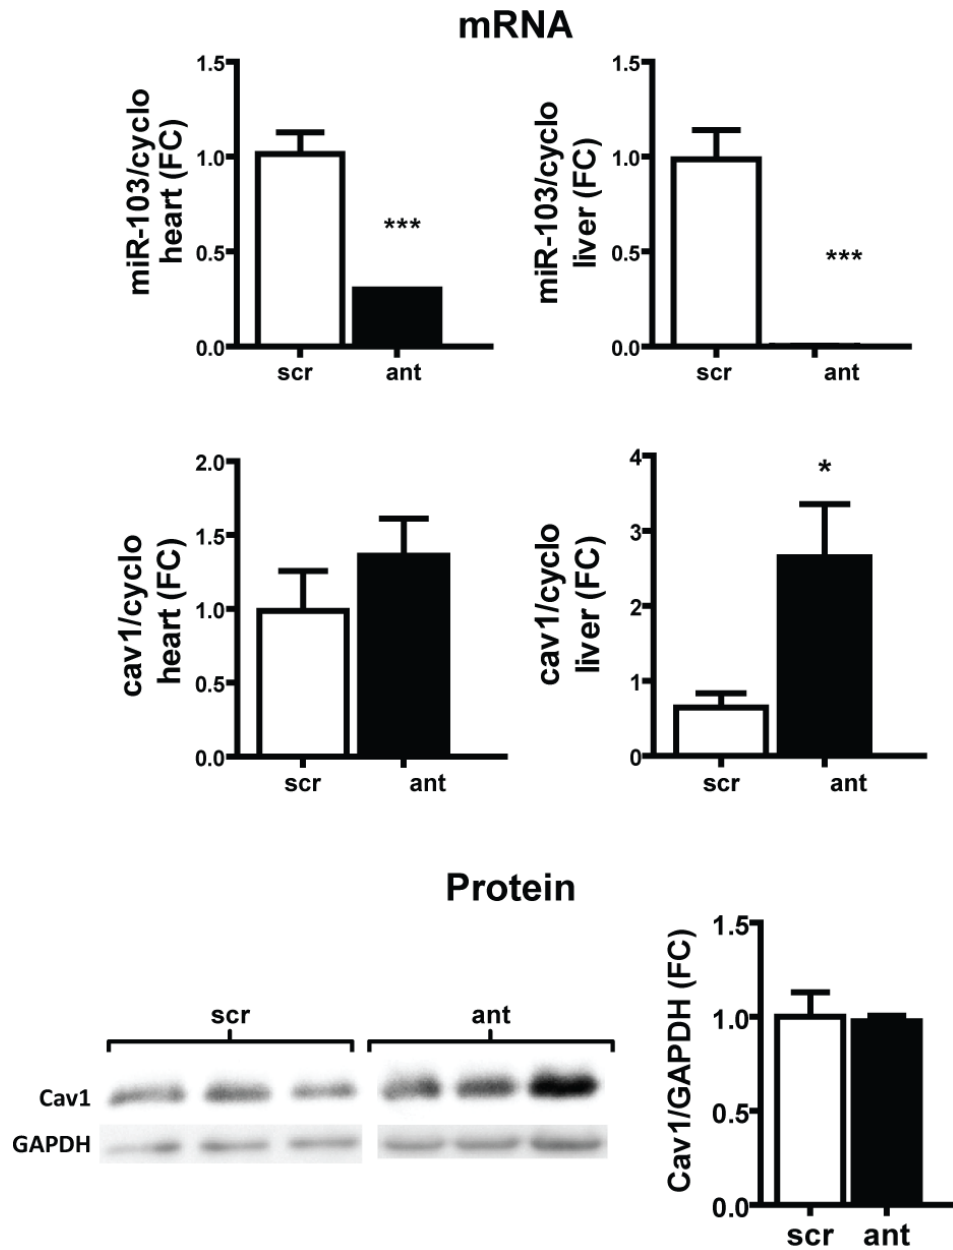

Figure S1. A) *MiR-103* and *Cav1* gene expression in heart and liver of animals treated with scrambled control or antagomiR-103/107, \*  $p < 0.05$  vs scrambled, \*\*\*  $p < 0.001$  vs scrambled,  $n = 7$  per group; B) representative western blot and quantification of Cav1 and GAPDH of the lysates of hearts treated with antagomiR-103/107 or scrambled,  $n = 3$  per group; data are shown as mean  $\pm$  SEM, scr, scrambled control, ant; antagomiR-103/107.

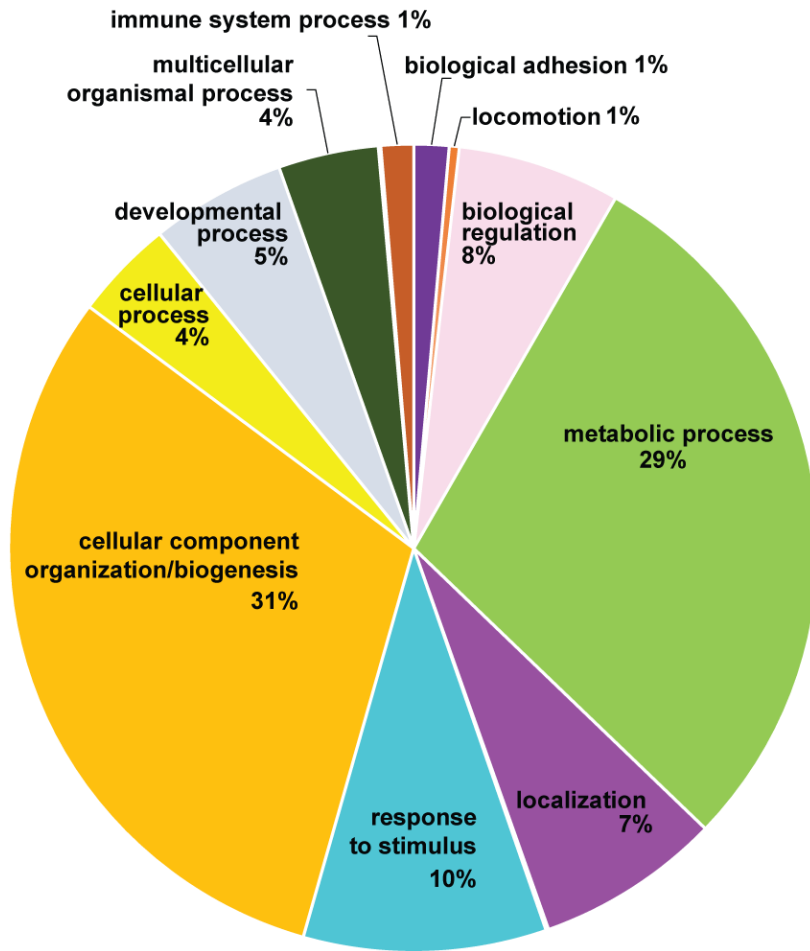

**Figure S2. Panther GO-slim biological processes annotation chart for predicted targets of miR-103/107. Total predicted genes: 838; total number of process hits: 1397**

## Supplemental tables

**Table S1. Hematological and immunological analysis in plasma of scrambled or antagomiR-103/107 treated mice at week 3.**

| Immune formula                         | Scrambled   |             | AntagomiR    |             |
|----------------------------------------|-------------|-------------|--------------|-------------|
|                                        | Mean        | ± SEM       | Mean         | ± SEM       |
| <b>WBC (10<sup>3</sup>/μL)</b>         | <b>5.17</b> | <b>0.24</b> | <b>3.94*</b> | <b>0.33</b> |
| Neutrophils (10 <sup>3</sup> /μL)      | 0.33        | 0.03        | 0.27         | 0.04        |
| % Neutrophils                          | 6.54        | 0.76        | 6.85         | 0.42        |
| <b>Lymphocytes (10<sup>3</sup>/μL)</b> | <b>4.64</b> | <b>0.27</b> | <b>3.48*</b> | <b>0.28</b> |
| % Lymphocytes                          | 89.54       | 1.61        | 88.30        | 0.91        |
| Monocytes (10 <sup>3</sup> /μL)        | 0.04        | 0.01        | 0.04         | 0.01        |
| % Monocytes                            | 0.78        | 0.31        | 0.90         | 0.19        |
| Eosinophils (10 <sup>3</sup> /μL)      | 0.01        | 0.00        | 0.03         | 0.03        |
| % Eosinophils                          | 0.22        | 0.04        | 0.87         | 0.64        |
| Basophils (10 <sup>3</sup> /μL)        | 0.15        | 0.03        | 0.12         | 0.02        |
| % Basophils                            | 2.91        | 0.62        | 3.08         | 0.21        |
| RBC (M/uL)                             | 6.10        | 0.18        | 6.58         | 0.11        |
| HGB (g/dL)                             | 8.97        | 0.26        | 9.68         | 0.18        |
| HCT (%)                                | 48.29       | 1.48        | 52.23        | 0.85        |
| MCV (fL)                               | 79.11       | 0.47        | 79.38        | 0.35        |
| MCH (pg)                               | 14.71       | 0.10        | 14.70        | 0.07        |
| MCHC (g/dL)                            | 18.59       | 0.06        | 18.53        | 0.06        |
| RDW (%)                                | 15.77       | 0.51        | 17.07        | 0.59        |
| PLT (K/dL)                             | 853.29      | 20.48       | 823.17       | 32.20       |
| MPV (fL)                               | 5.84        | 0.16        | 5.82         | 0.07        |
| PCT (%)                                | 0.50        | 0.03        | 0.48         | 0.02        |
| PDW (GSD)                              | 16.94       | 0.23        | 16.93        | 0.21        |

n=7 per group; \* p<0.05 vs scrambled

**Table S2. Mass spectrometry analysis of heart apex of scrambled or antagomiR-103/107 treated mice.**

| Protein                                                                               | UniProt ID | Unique Peptides | Log2 Ratio | Q-value  | Ant/ Scr | Ant [-]    | Ser [-]    | Data Points |
|---------------------------------------------------------------------------------------|------------|-----------------|------------|----------|----------|------------|------------|-------------|
| 26S proteasome non-ATPase regulatory subunit 7 [OS=Mus musculus]                      | P26516     | 4               | 0.52       | 1.81E-02 | 1.43     | 18129.9    | 12684.1    | 4           |
| complement factor H [OS=Mus musculus]                                                 | P06909     | 2               | 0.42       | 1.22E-02 | 1.34     | 5832.5     | 4345.8     | 2           |
| Hemopexin [OS=Mus musculus] <sup>a</sup>                                              | Q91X72     | 18              | 0.38       | 6.04E-11 | 1.30     | 248566.8   | 191392.4   | 23          |
| Peptidyl-prolyl cis-trans isomerase F, mitochondrial [OS=Mus musculus]                | Q99KR7     | 8               | 0.35       | 1.96E-02 | 1.27     | 24018.7    | 18844.0    | 9           |
| Complement C3 [OS=Mus musculus]                                                       | P01027-1   | 11              | 0.28       | 1.10E-02 | 1.21     | 50356.1    | 41446.4    | 12          |
| Actin, alpha skeletal muscle [OS=Mus musculus]                                        | P68134     | 3               | 0.28       | 1.84E-02 | 1.21     | 167488.3   | 138069.6   | 6           |
| Cytochrome c, somatic [OS=Mus musculus]                                               | P62897     | 24              | 0.27       | 9.73E-17 | 1.20     | 2779866.3  | 2307895.8  | 41          |
| Acylphosphatase-2 [OS=Mus musculus]                                                   | P56375     | 7               | 0.27       | 9.64E-04 | 1.20     | 122844.4   | 102199.0   | 8           |
| Aspartate aminotransferase, mitochondrial [OS=Mus musculus]                           | P05202     | 41              | 0.24       | 5.26E-14 | 1.18     | 1101538.9  | 933398.8   | 62          |
| Fibrinogen gamma chain [OS=Mus musculus]                                              | Q8VCM7     | 10              | 0.24       | 3.18E-03 | 1.18     | 68054.0    | 57702.7    | 10          |
| Myosin-7 [OS=Mus musculus]                                                            | Q91Z83     | 65              | 0.20       | 6.88E-05 | 1.15     | 1948494.3  | 1701126.8  | 96          |
| Fatty acid-binding protein, heart [OS=Mus musculus]                                   | P11404     | 23              | 0.18       | 3.80E-05 | 1.13     | 5532021.5  | 4883083.0  | 50          |
| Protein S100-A1 [OS=Mus musculus]                                                     | P56565     | 5               | 0.18       | 1.71E-02 | 1.13     | 183583.0   | 162465.1   | 8           |
| Actin, alpha cardiac muscle 1 [OS=Mus musculus] <sup>a</sup>                          | P68033     | 60              | 0.15       | 2.20E-03 | 1.11     | 61439824.0 | 55271280.0 | 163         |
| myosin regulatory light chain 2, ventricular/cardiac muscle isoform [OS=Mus musculus] | P51667     | 37              | 0.15       | 9.10E-03 | 1.11     | 7096360.5  | 6411138.5  | 83          |
| Translationally-controlled tumor protein [OS=Mus musculus]                            | P63028     | 10              | 0.14       | 1.10E-02 | 1.11     | 297646.4   | 269287.2   | 13          |
| Myosin-4 [OS=Mus musculus]                                                            | Q5SX39     | 14              | 0.14       | 3.85E-03 | 1.10     | 3429579.3  | 3111626.8  | 20          |
| Pregnancy zone protein [OS=Mus musculus]                                              | Q61838     | 13              | 0.12       | 9.46E-03 | 1.09     | 101444.3   | 93338.5    | 14          |
| Myoglobin [OS=Mus musculus] <sup>a</sup>                                              | P04247     | 36              | 0.12       | 3.72E-03 | 1.08     | 14948670.0 | 13778867.0 | 88          |
| Acyl-coenzyme A thioesterase 13 [OS=Mus musculus]                                     | Q9CQR4     | 13              | 0.10       | 1.04E-02 | 1.07     | 1336000.1  | 1245060.6  | 23          |
| Telethonin [OS=Mus musculus]                                                          | O70548     | 4               | 0.10       | 2.50E-03 | 1.07     | 153428.2   | 143335.0   | 4           |
| electron transfer flavoprotein subunit beta [OS=Mus musculus]                         | Q9DCW4     | 35              | 0.06       | 2.78E-06 | 1.04     | 3497220.5  | 3361798.3  | 57          |
| Cytochrome b-c1 complex subunit 7 [OS=Mus musculus]                                   | Q9D855     | 18              | 0.05       | 2.73E-05 | 1.04     | 1626810.6  | 1571087.5  | 30          |
| ATP synthase subunit gamma, mitochondrial [OS=Mus musculus]                           | Q91VR2     | 28              | 0.04       | 7.14E-05 | 1.03     | 1369158.4  | 1327708.0  | 44          |
| Laminin subunit alpha-2 [OS=Mus musculus]                                             | Q60675     | 60              | 0.03       | 7.67E-04 | 1.02     | 167368.0   | 164485.1   | 69          |
| glyceraldehyde-3-phosphate dehydrogenase [OS=Mus musculus]                            | P16858     | 38              | 0.02       | 4.55E-04 | 1.01     | 6986970.0  | 6887551.5  | 79          |
| Beta-enolase [OS=Mus musculus]                                                        | P21550     | 52              | -0.01      | 3.02E-04 | 0.99     | 2640891.5  | 2665133.0  | 92          |
| Adenylate kinase isoenzyme 1 [OS=Mus musculus]                                        | Q9R0Y5-1   | 25              | -0.02      | 2.39E-04 | 0.99     | 2043768.6  | 2069378.4  | 40          |
| Ornithine aminotransferase, mitochondrial [OS=Mus musculus]                           | P29758     | 17              | -0.03      | 1.64E-02 | 0.98     | 193450.4   | 197165.2   | 26          |
| Alpha-actinin-2 [OS=Mus musculus]                                                     | Q9JI91     | 120             | -0.03      | 8.73E-04 | 0.98     | 2255220.0  | 2309955.8  | 209         |
| Cysteine-rich protein 2 [OS=Mus musculus]                                             | Q9DCT8     | 16              | -0.04      | 1.76E-02 | 0.97     | 630263.5   | 648074.9   | 27          |
| NADH dehydrogenase [ubiquinone] 1 alpha subcomplex subunit 2 [OS=Mus musculus]        | Q9CQ75     | 11              | -0.05      | 1.33E-02 | 0.97     | 795473.6   | 821258.3   | 16          |
| Myosin-3 [OS=Mus musculus]                                                            | P13541     | 9               | -0.05      | 4.03E-03 | 0.97     | 1769777.5  | 1828452.1  | 11          |
| Cytochrome c oxidase subunit 6B1 [OS=Mus musculus]                                    | P56391     | 11              | -0.05      | 5.96E-04 | 0.97     | 6591877.0  | 6821341.0  | 18          |
| Malate dehydrogenase, cytoplasmic [OS=Mus musculus]                                   | P14152     | 37              | -0.05      | 8.40E-03 | 0.97     | 4713308.0  | 4881656.0  | 59          |
| Alpha-crystallin B chain [OS=Mus musculus]                                            | P23927     | 23              | -0.06      | 1.23E-02 | 0.96     | 1099699.0  | 1147986.0  | 47          |

|                                                                                                                 |                    |    |       |          |      |            |            |    |
|-----------------------------------------------------------------------------------------------------------------|--------------------|----|-------|----------|------|------------|------------|----|
| ATP synthase subunit d, mitochondrial [OS=Mus musculus]                                                         | Q9DCX2             | 21 | -0.07 | 3.51E-03 | 0.95 | 2873328.3  | 3010304.5  | 37 |
| Aspartate aminotransferase, cytoplasmic [OS=Mus musculus]                                                       | P05201             | 35 | -0.07 | 1.52E-03 | 0.95 | 1689716.6  | 1777122.5  | 55 |
| Isocitrate dehydrogenase [NAD] subunit alpha, mitochondrial [OS=Mus musculus]                                   | Q9D6R2             | 34 | -0.08 | 6.38E-04 | 0.95 | 1214956.3  | 1279973.0  | 57 |
| Malate dehydrogenase, mitochondrial [OS=Mus <sup>a</sup> musculus]                                              | P08249             | 39 | -0.08 | 3.74E-09 | 0.95 | 15937558.0 | 16827072.0 | 74 |
| Cytochrome b-c1 complex subunit 2, mitochondrial [OS=Mus musculus]                                              | Q9DB77             | 34 | -0.08 | 7.17E-03 | 0.94 | 2317813.8  | 2453957.8  | 58 |
| EH domain-containing protein 1 [OS=Mus musculus] <sup>a</sup>                                                   | Q9WVK4             | 15 | -0.08 | 3.45E-03 | 0.94 | 72112.0    | 76449.4    | 20 |
| Electron transfer flavoprotein subunit alpha, mitochondrial [OS=Mus musculus]                                   | Q99LC5             | 32 | -0.09 | 1.52E-04 | 0.94 | 4521429.5  | 4796793.5  | 58 |
| NADH dehydrogenase [ubiquinone] flavoprotein 1, mitochondrial [OS=Mus musculus]                                 | Q91YT0             | 37 | -0.09 | 3.95E-03 | 0.94 | 1150154.4  | 1222285.6  | 67 |
| Troponin I, cardiac muscle [OS=Mus musculus]                                                                    | P48787             | 31 | -0.10 | 3.99E-04 | 0.93 | 5298699.0  | 5685937.0  | 49 |
| Cytochrome c oxidase subunit 2 [OS=Mus musculus]                                                                | P00405             | 8  | -0.10 | 1.64E-02 | 0.93 | 4445445.5  | 4772605.0  | 16 |
| Heterogeneous nuclear ribonucleoproteins C1/C2 [OS=Mus musculus]                                                | Q9Z204;-2;-3;-4;-5 | 5  | -0.11 | 1.99E-02 | 0.93 | 39069.5    | 42063.2    | 5  |
| Carnitine O-palmitoyltransferase 2, mitochondrial [OS=Mus musculus]                                             | P52825             | 43 | -0.11 | 1.84E-03 | 0.93 | 349260.2   | 376413.4   | 54 |
| Very long-chain specific acyl-CoA dehydrogenase, mitochondrial [OS=Mus musculus]                                | P50544             | 48 | -0.11 | 8.97E-03 | 0.93 | 1795736.5  | 1940154.9  | 69 |
| Protein FAM136A [OS=Mus musculus] <sup>a</sup>                                                                  | Q9CR98             | 5  | -0.11 | 4.98E-03 | 0.92 | 46795.8    | 50645.9    | 7  |
| O-acetyl-ADP-ribose deacetylase MACROD1 [OS=Mus musculus]                                                       | Q922B1             | 20 | -0.12 | 9.49E-06 | 0.92 | 228717.3   | 247875.4   | 28 |
| EH domain-containing protein 4 [OS=Mus musculus] <sup>a</sup>                                                   | Q9EQP2             | 14 | -0.13 | 8.49E-06 | 0.92 | 179074.2   | 195609.8   | 15 |
| Dystroglycan [OS=Mus musculus]                                                                                  | Q62165             | 5  | -0.14 | 1.51E-03 | 0.91 | 17315.3    | 19054.6    | 6  |
| Peroxisiredoxin-5, mitochondrial [OS=Mus musculus]                                                              | P99029;-2          | 15 | -0.14 | 3.71E-03 | 0.91 | 2688488.0  | 2962060.0  | 26 |
| Mitochondrial import inner membrane translocase subunit TIM44 [OS=Mus musculus]                                 | O35857             | 10 | -0.14 | 2.32E-03 | 0.91 | 36331.5    | 40140.4    | 11 |
| Methylcrotonoyl-CoA carboxylase beta chain, mitochondrial [OS=Mus musculus]                                     | Q3ULD5             | 25 | -0.15 | 1.07E-03 | 0.90 | 228112.0   | 252481.9   | 30 |
| Guanine nucleotide-binding protein G(I)/G(S)/G(T) subunit beta-2 [OS=Mus musculus]                              | P62880             | 4  | -0.15 | 1.83E-02 | 0.90 | 40107.8    | 44575.5    | 5  |
| Heterogeneous nuclear ribonucleoprotein U [OS=Mus musculus]                                                     | Q8VEK3             | 7  | -0.16 | 2.96E-03 | 0.90 | 24624.8    | 27453.8    | 11 |
| medium-chain specific acyl-CoA dehydrogenase, mitochondrial [OS=Mus musculus]                                   | P45952             | 38 | -0.16 | 4.07E-03 | 0.90 | 3404054.5  | 3796175.8  | 65 |
| haloacid dehalogenase-like hydrolase domain-containing protein 2 [OS=Mus musculus]                              | Q3UGR5-1           | 4  | -0.16 | 1.18E-02 | 0.90 | 49349.2    | 55088.4    | 4  |
| Long-chain-fatty-acid-CoA ligase 1 [OS=Mus musculus] <sup>a</sup>                                               | P41216             | 55 | -0.16 | 2.96E-08 | 0.89 | 849570.8   | 950392.8   | 73 |
| Hemoglobin subunit beta-2 [OS=Mus musculus]                                                                     | P02089             | 6  | -0.16 | 1.58E-04 | 0.89 | 16437964.0 | 18395956.0 | 13 |
| Long-chain specific acyl-CoA dehydrogenase, mitochondrial [OS=Mus musculus] <sup>a</sup>                        | P51174             | 36 | -0.16 | 1.65E-02 | 0.89 | 4784476.5  | 5356746.5  | 58 |
| Heterogeneous nuclear ribonucleoprotein M [OS=Mus musculus]                                                     | Q9D0E1;-2          | 8  | -0.16 | 1.38E-03 | 0.89 | 41784.1    | 46842.8    | 8  |
| Bifunctional glutamate/proline-tRNA ligase [OS=Mus musculus]                                                    | Q8CGC7             | 14 | -0.17 | 5.65E-03 | 0.89 | 61504.2    | 69178.1    | 14 |
| Branched-chain-amino-acid aminotransferase, mitochondrial [OS=Mus musculus] <sup>a</sup>                        | O35855             | 15 | -0.19 | 4.74E-05 | 0.88 | 217851.4   | 248441.3   | 19 |
| Delta(3,5)-Delta(2,4)-dienoyl-CoA isomerase, mitochondrial [OS=Mus musculus]                                    | O35459             | 29 | -0.19 | 5.16E-03 | 0.87 | 727510.5   | 831638.0   | 44 |
| Dihydrolypoyllysine-residue succinyltransferase comp of 2-oxoglutarate dehydrogenase complex, [OS=Mus musculus] | Q9D2G2-1           | 28 | -0.19 | 3.66E-03 | 0.87 | 2201266.3  | 2518189.5  | 38 |
| T-complex protein 1 subunit delta [OS=Mus musculus]                                                             | P80315             | 4  | -0.20 | 4.20E-03 | 0.87 | 13949.2    | 16061.8    | 4  |
| NADH dehydrogenase [ubiquinone] iron-sulfur protein 7, mitochondrial [OS=Mus musculus]                          | Q9DC70             | 13 | -0.22 | 6.39E-03 | 0.86 | 353860.3   | 411094.7   | 17 |
| 40S ribosomal protein S11 [OS=Mus musculus]                                                                     | P62281             | 2  | -0.22 | 7.82E-04 | 0.86 | 13002.6    | 15128.0    | 3  |
| NADH dehydrogenase [ubiquinone] 1 beta subcomplex subunit 10 [OS=Mus musculus] <sup>a</sup>                     | Q9DCS9             | 21 | -0.22 | 3.54E-03 | 0.86 | 734613.3   | 856187.3   | 32 |
| sorting and assembly machinery component 50 homolog [OS=Mus musculus]                                           | Q8BGH2             | 10 | -0.22 | 1.68E-02 | 0.86 | 96777.8    | 112939.0   | 11 |
| Acyl-coenzyme A thioesterase 2, mitochondrial [OS=Mus musculus] <sup>a</sup>                                    | Q9QYR9             | 26 | -0.23 | 1.49E-03 | 0.85 | 567183.2   | 663567.3   | 35 |

|                                                                        |                   |    |       |          |      |           |           |    |
|------------------------------------------------------------------------|-------------------|----|-------|----------|------|-----------|-----------|----|
| Laminin subunit beta-1 [OS=Mus musculus]                               | P02469            | 14 | -0.23 | 2.37E-03 | 0.85 | 171563.8  | 200856.8  | 16 |
| fructosamine-3-kinase [OS=Mus musculus]                                | Q9ER35            | 2  | -0.23 | 4.66E-03 | 0.85 | 26484.9   | 31151.6   | 2  |
| EH domain-containing protein 2 [OS=Mus musculus]                       | Q8BH64            | 18 | -0.23 | 1.02E-03 | 0.85 | 133321.6  | 156871.3  | 25 |
| 60S ribosomal protein L10-like [OS=Mus musculus]                       | P86048;Q6ZWW3     | 5  | -0.27 | 1.63E-05 | 0.83 | 65484.8   | 78754.8   | 5  |
| adiponectin [OS=Mus musculus]                                          | Q60994            | 3  | -0.28 | 7.19E-03 | 0.82 | 22722.7   | 27560.4   | 3  |
| Lon protease homolog, mitochondrial [OS=Mus musculus]                  | Q8CGK3            | 19 | -0.28 | 2.78E-03 | 0.82 | 175859.7  | 213585.7  | 23 |
| 40S ribosomal protein S2 [OS=Mus musculus]                             | P25444            | 4  | -0.29 | 3.19E-03 | 0.82 | 34421.7   | 41953.7   | 4  |
| Selenium-binding protein 1 [OS=Mus musculus]                           | P17563            | 9  | -0.29 | 5.88E-06 | 0.82 | 72690.8   | 88882.3   | 10 |
| NAD kinase 2, mitochondrial [OS=Mus musculus];                         | Q8C5H8-1;-2;-3;-4 | 2  | -0.30 | 7.84E-03 | 0.81 | 4520.9    | 5569.2    | 2  |
| Transketolase [OS=Mus musculus]                                        | P40142            | 9  | -0.31 | 6.82E-03 | 0.81 | 20513.9   | 25462.9   | 9  |
| C-1-tetrahydrofolate synthase, cytoplasmic [OS=Mus musculus]           | Q922D8            | 3  | -0.36 | 1.64E-02 | 0.78 | 5013.7    | 6419.4    | 3  |
| Heat shock protein HSP 90-alpha [OS=Mus musculus]                      | P07901            | 8  | -0.36 | 1.77E-02 | 0.78 | 180191.6  | 231620.6  | 11 |
| histone H3.2 [OS=Mus musculus]                                         | P84228            | 1  | -0.36 | 8.62E-05 | 0.78 | 88267.4   | 113576.8  | 3  |
| 40S ribosomal protein S8 [OS=Mus musculus]                             | P62242            | 5  | -0.38 | 1.73E-07 | 0.77 | 25016.8   | 32583.1   | 6  |
| 60S ribosomal protein L7a [OS=Mus musculus]                            | P12970            | 8  | -0.41 | 1.73E-02 | 0.76 | 16516.1   | 21871.5   | 8  |
| 60S ribosomal protein L32 [OS=Mus musculus] <sup>a</sup>               | P62911            | 4  | -0.42 | 1.97E-02 | 0.75 | 8644.8    | 11577.0   | 5  |
| Catenin beta-1 [OS=Mus musculus]                                       | Q02248            | 5  | -0.45 | 3.71E-03 | 0.73 | 9466.7    | 12930.9   | 5  |
| Histone H1.0 [OS=Mus musculus]                                         | P10922            | 5  | -0.47 | 1.44E-05 | 0.72 | 23809.3   | 33064.0   | 5  |
| 60S ribosomal protein L27a [OS=Mus musculus]                           | P14115            | 5  | -0.48 | 1.50E-02 | 0.72 | 37959.2   | 52889.9   | 5  |
| Aspartyl aminopeptidase [OS=Mus musculus]                              | Q9Z2W0            | 3  | -0.48 | 9.84E-04 | 0.72 | 28783.8   | 40217.2   | 3  |
| Histone H1.3 [OS=Mus musculus]                                         | P43277            | 11 | -0.55 | 8.45E-05 | 0.68 | 74064.0   | 108330.6  | 16 |
| 60S ribosomal protein L7 [OS=Mus musculus]                             | P14148            | 6  | -0.56 | 1.81E-02 | 0.68 | 9013.1    | 13247.8   | 6  |
| histone H4 [OS=Mus musculus] <sup>a</sup>                              | P62806            | 11 | -0.57 | 1.65E-09 | 0.67 | 1654453.1 | 2456581.3 | 16 |
| Alpha-actinin-3 [OS=Mus musculus]                                      | O88990            | 2  | -0.61 | 1.82E-03 | 0.66 | 18781.9   | 28585.9   | 3  |
| 60S ribosomal protein L14 [OS=Mus musculus]                            | Q9CR57            | 3  | -0.65 | 1.88E-03 | 0.64 | 10302.6   | 16135.4   | 4  |
| 40S ribosomal protein S25 [OS=Mus musculus]                            | P62852            | 3  | -0.69 | 1.90E-03 | 0.62 | 37913.7   | 60990.8   | 3  |
| Histone H3.1 [OS=Mus musculus]                                         | P68433            | 14 | -0.69 | 1.02E-19 | 0.62 | 1074207.0 | 1730754.3 | 18 |
| Histone H3.3C [OS=Mus musculus];histone H3.3 [OS=Mus musculus]         | P02301;P84244     | 2  | -0.72 | 1.21E-03 | 0.61 | 39108.6   | 64587.5   | 3  |
| Glutathione reductase, mitochondrial [OS=Mus musculus] <sup>a</sup>    | P47791;P47791-2   | 2  | -0.81 | 6.20E-03 | 0.57 | 8223.1    | 14383.9   | 2  |
| Myosin-1 [OS=Mus musculus]                                             | Q5SX40            | 1  | -0.83 | 3.74E-06 | 0.56 | 262413.5  | 465269.9  | 2  |
| Eukaryotic translation initiation factor 3 subunit I [OS=Mus musculus] | Q9QZD9            | 3  | -0.94 | 1.96E-02 | 0.52 | 3608.7    | 6943.2    | 4  |

n=3 per group analyzed in technical triplicates. Ant [-], average of antagomiR-103/107; Scr [-], average of scrambled control; [-], no unit; Log2 ratio represents the average of the Log2 ratios of the 3 samples per group; <sup>a</sup>, target of miR-103/107 based on TargetScan prediction.
